# Supplementary material for: Delayed Motor Milestones Achievement in Infancy Associates with Perturbations of Amino Acids and Lipid Metabolic Pathways
Source: PubMed Central journal article supplement (PMC7570268; doi:10.3390/metabo10090337), 2020-08-19

**Supplementary figures and tables:**

**Table S1.** Baseline characteristics of the 700 children in the COPSAC2010 cohort.

|                                              | <b>Study Group</b><br>N = 571 | <b>Drop-out</b><br>N = 129 | <b>P-value</b> |
|----------------------------------------------|-------------------------------|----------------------------|----------------|
| <b>Demographics</b>                          |                               |                            |                |
| Caucasian% ( N)                              | 96 (548)                      | 94,5(122)                  | 0.64           |
| Male % (N)                                   | 51 (291)                      | 53.3 (69)                  | 0.67           |
| Mother age at birth-mean (SD)                | 32.01 (4.45)                  | 32.88 (4.76)               | 0.05           |
| Social circumstances mean (SD)               | -0.02 (1.01)                  | 0.07 (0.96)                | 0.37           |
| <b>Pregnancy</b>                             |                               |                            |                |
| Nulliparity % (N)                            | 59 (45.7)                     | 318 (55.7)                 | 0.05           |
| Season of birth                              |                               |                            | 0.32           |
| Winter % (N)                                 | 32.2 (184)                    | 38.0(49)                   |                |
| Spring % (N)                                 | 20.8 (119)                    | 24.0 (31)                  |                |
| Summer % (N)                                 | 23.6 (135)                    | 20.2(26)                   |                |
| Fall % (N)                                   | 23.3 (133)                    | 17.8 (23)                  |                |
| Cat or dog in pregnancy % (N)                | 36.1 (206)                    | 31.0 (40)                  | 0.32           |
| Antibiotics in pregnancy % (N)               | 32.5 (185)                    | 44.2 (57)                  | 0.03           |
| Pre-eclampsia % (N)                          | 4.6 (26)                      | 4.7 (6)                    | 0.89           |
| Delivery method                              |                               |                            | 0.46           |
| Vaginal % (N)                                | 79.3 (453)                    | 74.4 (96)                  |                |
| Planned caesarean section % (N)              | 9.1 (52)                      | 10.9 (14)                  |                |
| Acute cesarean section % (N)                 | 11.6 (66)                     | 14.7 (19)                  |                |
| Maternal pre-pregnancy BMI<br>Mean (SD)      | 24.66 (4.53)                  | 24.02 (3.68)               | 0.14           |
| Gestational age, mean (SD)                   | 279.89 (10.53)                | 275.06 (15.08)             | 0.001          |
| Age of solely breastfeeding                  | 105.54 (58.29)                | 92.15 (66.26)              | 0.02           |
| Maternal asthma; % (N)                       | 26.4 (151)                    | 27.9 (36)                  | 0.89           |
| Smoking during pregnancy; % (N)              | 6.8 (39)                      | 10.1(13)                   | 0.28           |
| <b>Anthropometrics</b>                       |                               |                            |                |
| Head circumference at 6 months;<br>Mean (SD) | 43.81 (1.34)                  | 43.72 (1.48)               | 0.49           |
| z-score BMI at 6 months;<br>mean (SD)        | 0.04 (0.91)                   | 0.23 (0.98)                | 0.04           |

**Table S2.** Nominal significant association ( $p$ -value  $\leq 0.05$ ) between metabolites level in children at 6 months of age and in mothers at week 24 of pregnancy and at week 1 after birth and gross-motor milestone achievement.

| Super Pathway     | Sub Pathway                                      | Metabolite                                       | Child 6 Months    |           | Mother Week 24    |             | Mother Week 1     |             |
|-------------------|--------------------------------------------------|--------------------------------------------------|-------------------|-----------|-------------------|-------------|-------------------|-------------|
|                   |                                                  |                                                  | $\beta$ -estimate | p         | $\beta$ -estimate | p           | $\beta$ -estimate | p           |
| Amino Acid        | Tyrosine Metabolism                              | tyramine O-sulfate                               | 0.3001            | 0.0002(*) | -0.0184           | 0.8021      | -0.0947           | 0.2032      |
|                   |                                                  | 3-(4-hydroxyphenyl)lactate (HPLA)                | -0.2769           | 0.0008    | -0.0606           | 0.4147      | -0.0431           | 0.5688      |
|                   |                                                  | thyroxine                                        | -0.2069           | 0.0122    | 0.0995            | 0.1955      | 0.0561            | 0.4604      |
|                   | Tryptophan Metabolism                            | indole-3-carboxylic acid                         | -0.1767           | 0.0358    | Not Present       | Not Present | Not Present       | Not Present |
|                   |                                                  | C-glycosyltryptophan                             | -0.1678           | 0.0418    | -0.0024           | 0.9760      | -0.0597           | 0.4434      |
|                   |                                                  | 5-bromotryptophan                                | 0.1750            | 0.0369    | NA                | NA          | NA                | NA          |
|                   | Urea cycle; Arginine and Proline Metabolism      | homocitrulline                                   | -0.1930           | 0.0204    | 0.0947            | 0.2260      | 0.0037            | 0.9620      |
|                   |                                                  | N-methylproline                                  | -0.1836           | 0.0250    | 0.0064            | 0.9324      | -0.0599           | 0.4400      |
|                   | Polyamine Metabolism                             | acisoga                                          | -0.2245           | 0.0066    | Not Present       | Not Present | Not Present       | Not Present |
|                   |                                                  | (N(1) + N(8))-acetylspermidine                   | -0.1946           | 0.0182    | -0.1300           | 0.0918      | -0.0747           | 0.3199      |
|                   | Methionine, Cysteine, SAM and Taurine Metabolism | N-formylmethionine                               | -0.2404           | 0.0033    | -0.1530           | 0.0434      | -0.2151           | 0.0049      |
|                   |                                                  | 2,3-dihydroxy-5-methylthio-4-pentenoate (DMTPA)* | -0.1789           | 0.0344    | -0.1140           | 0.1412      | -0.0035           | 0.9635      |
| Lysine Metabolism | 5-hydroxylysine                                  | -0.2368                                          | 0.0041            | -0.0684   | 0.3900            | -0.2149     | 0.0047            |             |

| Super Pathway | Sub Pathway                                | Metabolite                    | Child<br>6 Months |        | Mother<br>Week 24 |        | Mother<br>Week 1  |        |
|---------------|--------------------------------------------|-------------------------------|-------------------|--------|-------------------|--------|-------------------|--------|
|               |                                            |                               | $\beta$ -estimate | p      | $\beta$ -estimate | p      | $\beta$ -estimate | p      |
|               |                                            | N6,N6,N6-trimethyllysine      | -0.1711           | 0.0372 | -0.1083           | 0.1419 | -0.0435           | 0.5615 |
|               | Leucine, Isoleucine and Valine Metabolism  | 3-methylglutarylcarnitine (2) | -0.1743           | 0.0327 | -0.0379           | 0.6274 | -0.0162           | 0.8311 |
|               | Histidine Metabolism                       | imidazole lactate             | -0.2602           | 0.0020 | -0.0613           | 0.4231 | -0.0757           | 0.3124 |
|               |                                            | N-acetylcarnosine             | -0.1771           | 0.0310 | 0.0117            | 0.8769 | -0.0213           | 0.7875 |
|               |                                            | 1-methyl-5-imidazoleacetate   | -0.1907           | 0.0211 | 0.0343            | 0.6566 | -0.0057           | 0.9448 |
|               | Glycine, Serine and Threonine Metabolism   | threonine                     | -0.1919           | 0.0227 | -0.2358           | 0.0022 | -0.1448           | 0.0544 |
|               |                                            | N-acetylthreonine             | -0.1771           | 0.0337 | -0.0340           | 0.6496 | -0.1381           | 0.0699 |
|               | Glutathione Metabolism                     | cysteinylglycine disulfide*   | -0.1664           | 0.0424 | 0.0376            | 0.6409 | -0.0519           | 0.5080 |
|               |                                            | cys-gly, oxidized             | -0.1646           | 0.0449 | 0.0767            | 0.3438 | 0.0302            | 0.6951 |
|               | Glutamate Metabolism                       | pyroglutamine*                | -0.2191           | 0.0085 | 0.0002            | 0.9974 | -0.0779           | 0.3314 |
|               | Creatine Metabolism                        | creatinine                    | -0.2377           | 0.0038 | -0.0699           | 0.3576 | -0.0794           | 0.2980 |
|               |                                            | creatine                      | 0.2036            | 0.0157 | -0.1063           | 0.1613 | 0.0381            | 0.6173 |
|               | Alanine and Aspartate Metabolism           | N-acetylalanine               | -0.2516           | 0.0020 | -0.0218           | 0.7750 | -0.0468           | 0.5381 |
|               |                                            | hydroxyasparagine             | -0.2228           | 0.0078 | -0.0830           | 0.3096 | -0.0951           | 0.2376 |
| Carbohydrate  | Fructose, Mannose and Galactose Metabolism | fructose                      | -0.2237           | 0.0061 | -0.0495           | 0.5336 | -0.0963           | 0.1951 |
|               |                                            | mannitol/sorbitol             | 0.2023            | 0.0142 | -0.0242           | 0.7594 | -0.0890           | 0.2560 |
|               |                                            | mannose                       | -0.1685           | 0.0401 | 0.0638            | 0.4246 | 0.0128            | 0.8666 |

| Super Pathway          | Sub Pathway                            | Metabolite                                             | Child<br>6 Months |        | Mother<br>Week 24 |             | Mother<br>Week 1  |             |
|------------------------|----------------------------------------|--------------------------------------------------------|-------------------|--------|-------------------|-------------|-------------------|-------------|
|                        |                                        |                                                        | $\beta$ -estimate | p      | $\beta$ -estimate | p           | $\beta$ -estimate | p           |
| Cofactors and Vitamins | Nicotinate and Nicotinamide Metabolism | trigonelline (N'-methylnicotinate)                     | -0.2147           | 0.0098 | -0.0391           | 0.6406      | 0.0131            | 0.8733      |
|                        | Sterol                                 | 7-HOCA                                                 | -0.1676           | 0.0424 | 0.0557            | 0.4778      | -0.1138           | 0.1354      |
| Lipid                  | Sphingolipid Metabolism                | sphinganine-1-phosphate                                | -0.1870           | 0.0225 | 0.1424            | 0.0616      | 0.0667            | 0.3882      |
|                        |                                        | sphingosine 1-phosphate                                | -0.1734           | 0.0352 | 0.1127            | 0.1423      | 0.0927            | 0.2324      |
|                        | Primary Bile Acid Metabolism           | glycochenodeoxycholate glucuronide (1)                 | 0.1719            | 0.0374 | 0.0878            | 0.2662      | 0.0802            | 0.3484      |
|                        |                                        | glycochenodeoxycholate                                 | 0.1689            | 0.0420 | 0.0221            | 0.7658      | -0.0191           | 0.7965      |
|                        | Plasmalogen                            | 1-(1-enyl-palmitoyl)-2-arachidonoyl-GPC (P-16:0/20:4)* | -0.2312           | 0.0049 | -0.0138           | 0.8580      | -0.0882           | 0.2939      |
|                        |                                        | 1-(1-enyl-palmitoyl)-2-arachidonoyl-GPE (P-16:0/20:4)* | -0.1911           | 0.0202 | 0.0395            | 0.6073      | -0.0384           | 0.6292      |
|                        | Glycerolipid Metabolism                | glycerophosphoglycerol                                 | -0.1641           | 0.0487 | 0.0702            | 0.3601      | 0.0026            | 0.9713      |
|                        | Fatty Acid Monohydroxy                 | 2-hydroxydecanoate                                     | -0.2605           | 0.0017 | 0.0889            | 0.2447      | 0.2050            | 0.0065      |
|                        |                                        | 5-hydroxyhexanoate                                     | -0.1623           | 0.0494 | Not Present       | Not Present | Not Present       | Not Present |

| Super Pathway | Sub Pathway                                 | Metabolite                         | Child<br>6 Months |        | Mother<br>Week 24 |             | Mother<br>Week 1  |             |
|---------------|---------------------------------------------|------------------------------------|-------------------|--------|-------------------|-------------|-------------------|-------------|
|               |                                             |                                    | $\beta$ -estimate | p      | $\beta$ -estimate | p           | $\beta$ -estimate | p           |
|               |                                             | 3-hydroxyoleate*                   | -0.1758           | 0.0337 | Not Present       | Not Present | Not Present       | Not Present |
|               | Fatty Acid Amino                            | N-acetyl-2-aminooctanoate*         | -0.1843           | 0.0311 | 0.0131            | 0.8602      | -0.0845           | 0.2663      |
|               | Fatty Acid Metabolism<br>(Acyl Carnitine)   | octadecanedioylcarnitine (C18-DC)* | 0.1804            | 0.0316 | -0.0151           | 0.8430      | -0.0518           | 0.5079      |
|               |                                             | linoleoylcarnitine (C18:2)*        | -0.1724           | 0.0386 | 0.1135            | 0.1544      | -0.0330           | 0.6711      |
|               |                                             | arachidonoylcarnitine (C20:4)      | -0.1643           | 0.0477 | -0.0291           | 0.7096      | -0.0048           | 0.9520      |
| Unknown       | Unknown                                     | X - 12216                          | 0.1920            | 0.0193 | 0.0809            | 0.3229      | 0.0338            | 0.7064      |
|               |                                             | X - 18913                          | -0.1902           | 0.0218 | 0.1107            | 0.1481      | 0.1804            | 0.0194      |
|               |                                             | X - 11795                          | 0.1839            | 0.0277 | -0.0046           | 0.9511      | -0.0500           | 0.5081      |
|               |                                             | X - 17185                          | 0.1746            | 0.0320 | 0.0697            | 0.3709      | 0.0503            | 0.5707      |
|               |                                             | X - 12026                          | -0.1831           | 0.0279 | 0.0846            | 0.2748      | 0.0163            | 0.8383      |
|               |                                             | X - 23680                          | -0.1738           | 0.0488 | -0.0045           | 0.9564      | -0.0015           | 0.9873      |
|               |                                             | X - 17335                          | -0.1774           | 0.0402 | Not Present       | Not Present | Not Present       | Not Present |
| Nucleotide    | Pyrimidine Metabolism,<br>Uracil containing | pseudouridine                      | -0.1803           | 0.0285 | -0.0868           | 0.2532      | -0.1278           | 0.1026      |
|               |                                             | uridine                            | -0.1685           | 0.0401 | 0.0171            | 0.8197      | 0.0033            | 0.9652      |

| Super Pathway | Sub Pathway                                                | Metabolite                     | Child<br>6 Months |        | Mother<br>Week 24 |        | Mother<br>Week 1  |        |
|---------------|------------------------------------------------------------|--------------------------------|-------------------|--------|-------------------|--------|-------------------|--------|
|               |                                                            |                                | $\beta$ -estimate | p      | $\beta$ -estimate | p      | $\beta$ -estimate | p      |
|               | Pyrimidine Metabolism,<br>Cytidine containing              | 2'-O-methylcytidine            | -0.1925           | 0.0196 | 0.0769            | 0.3098 | 0.0657            | 0.3820 |
|               | Purine Metabolism,<br>Adenine containing                   | N6-carbamoylthreonyl-adenosine | -0.1966           | 0.0170 | -0.0987           | 0.1981 | -0.1664           | 0.0305 |
|               | Purine Metabolism,<br>(Hypo)Xanthine/Inosine<br>containing | N1-methylinosine               | -0.2242           | 0.0063 | -0.0457           | 0.5738 | -0.0978           | 0.2135 |
|               |                                                            | urate                          | -0.1621           | 0.0477 | -0.0775           | 0.3209 | -0.1025           | 0.1858 |
| Peptide       | Gamma-glutamyl<br>Amino Acid                               | gamma-glutamylhistidine        | -0.1853           | 0.0236 | -0.1526           | 0.0488 | -0.1965           | 0.0090 |
|               |                                                            | stachydrine                    | -0.1967           | 0.0173 | -0.0009           | 0.9906 | -0.0489           | 0.5300 |
| Xenobiotics   | Food Component/Plant                                       | (S)-a-amino-omega-caprolactam  | -0.2555           | 0.0019 | -0.0028           | 0.9698 | -0.0171           | 0.8357 |

(\*): FDR  $\leq$  0.25

The metabolites highlighted in **bold** and *italic* are replicated in the mother's metabolome.

**Figure S1.** Correlation map (based on Spearman correlation) of the nominal significant metabolites in the association between child 6mo metabolome and gross motor milestone.

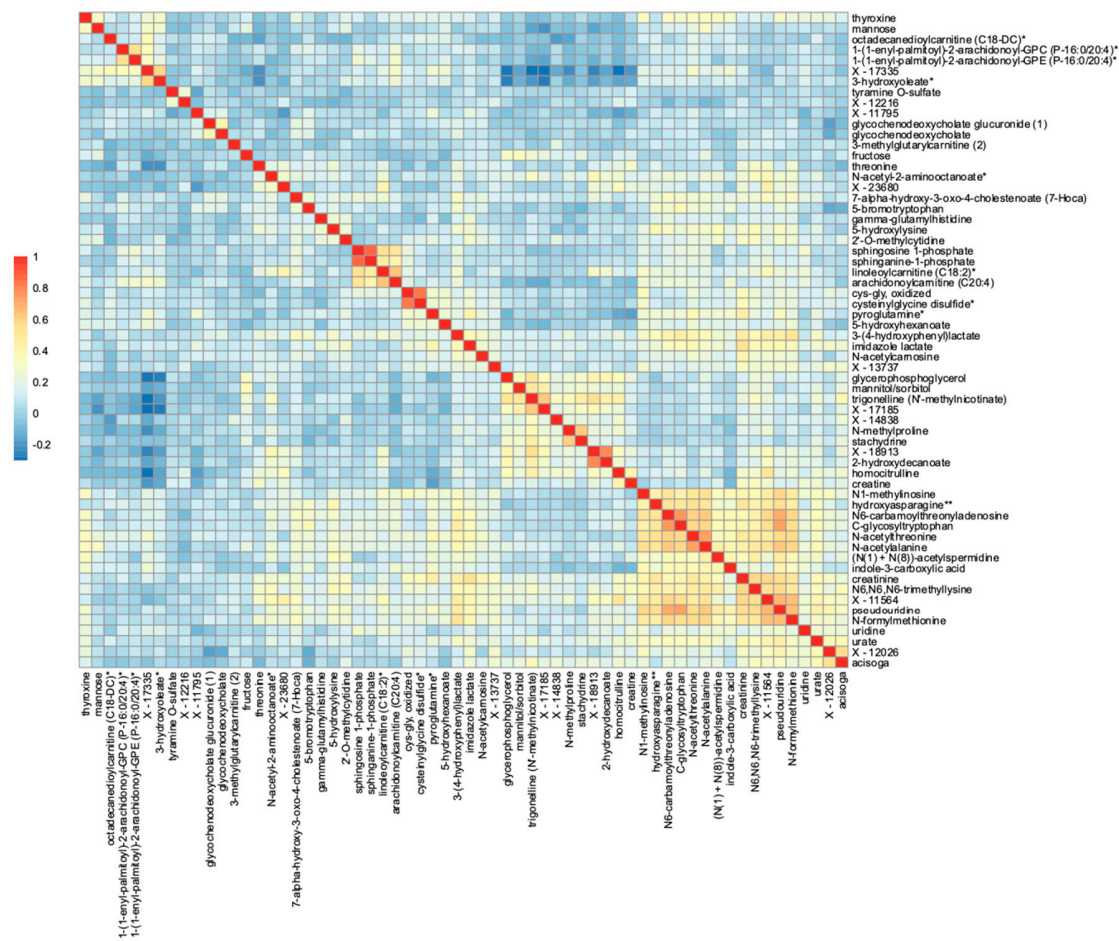

**Figure S2.** Correlation map (based on Spearman correlation) between the significant metabolite level in the child at 6mo and the mother at w24 and w1.

Mw1: Mother at week1; Mw24: Mother at week 24.

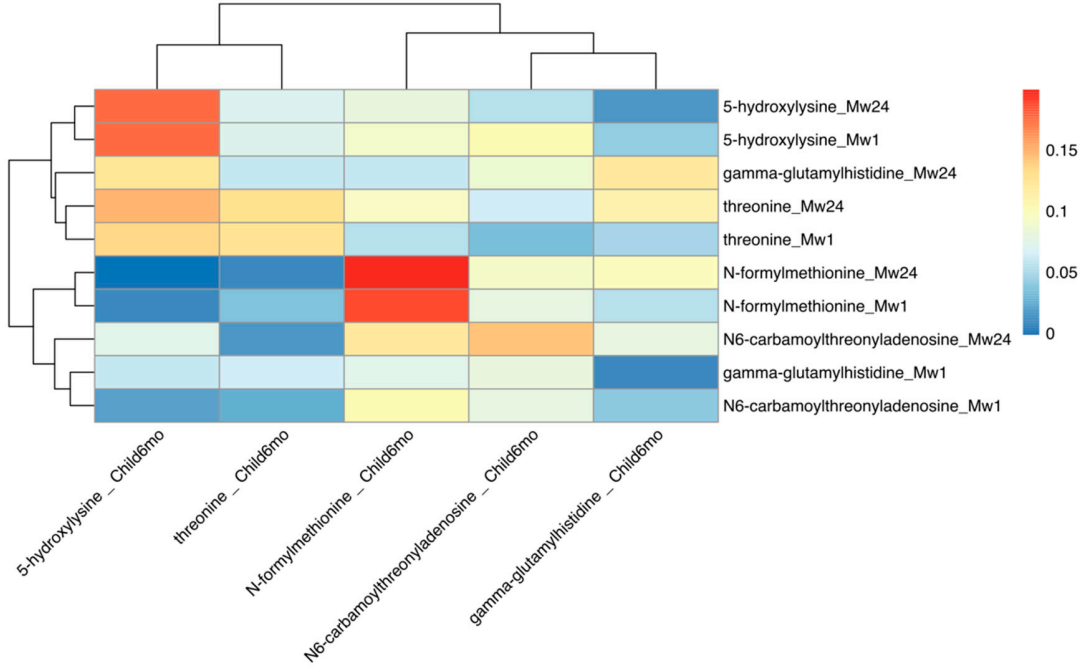



**Table S3.** Association between metabolites level in children at 6 months of age and gross-motor milestone achievement. Analysis adjusted for mother’s metabolite level at w24 and w1.

| Super Pathway | Sub Pathway                                      | Metabolite                  | Mother’s Level Adjustment       | $\beta$ -estimate | p      | CI Low  | CI High |
|---------------|--------------------------------------------------|-----------------------------|---------------------------------|-------------------|--------|---------|---------|
| Amino Acid    | Tyrosine Metabolism                              | tyramine O-sulfate          | tyramine O-sulfate_w24          | 0.3010            | 0.0002 | 0.1419  | 0.4601  |
|               |                                                  | tyramine O-sulfate          | tyramine O-sulfate_w1           | 0.3060            | 0.0002 | 0.1460  | 0.4660  |
|               | Glycine, Serine and Threonine Metabolism         | Threonine                   | Threonine_w24                   | -0.1876           | 0.0289 | -0.3557 | -0.0194 |
|               |                                                  | Threonine                   | Threonine_w1                    | -0.1865           | 0.0311 | -0.3560 | -0.0170 |
|               | Lysine Metabolism                                | 5-hydroxylysine             | 5-hydroxylysine_w24             | -0.2248           | 0.0074 | -0.3891 | -0.0605 |
|               |                                                  | 5-hydroxylysine             | 5-hydroxylysine_w1              | -0.2050           | 0.0144 | -0.3690 | -0.0411 |
|               | Methionine, Cysteine, SAM and Taurine Metabolism | N-formylmethionine          | N-formylmethionine_w24          | -0.2030           | 0.0168 | -0.3693 | -0.0367 |
|               |                                                  | N-formylmethionine          | N-formylmethionine_w1           | -0.2132           | 0.0120 | -0.3793 | -0.0471 |
| Nucleotide    | Purine Metabolism, Adenine containing            | N6-carbamoylthreonyladenine | N6-carbamoylthreonyladenine_w24 | -0.1829           | 0.0318 | -0.3499 | -0.0160 |
|               |                                                  | N6-carbamoylthreonyladenine | N6-carbamoylthreonyladenine_w1  | -0.1897           | 0.0213 | -0.3510 | -0.0284 |
| Peptide       | Gamma-glutamyl Amino Acid                        | gamma-glutamyl histidine    | gamma-glutamyl histidine_w24    | -0.1782           | 0.0324 | -0.3414 | -0.0150 |
|               |                                                  | gamma-glutamyl histidine    | gamma-glutamyl histidine_w1     | -0.1873           | 0.0225 | -0.3480 | -0.0265 |

**Table S4.** Metabolites in the PLS-DA model and their associated VIP value.

| Metabolite                         | Sub Pathway                                      | VIP            |       |
|------------------------------------|--------------------------------------------------|----------------|-------|
| hydroxyasparagine**                | Alanine and Aspartate Metabolism                 | 0.817          |       |
| N-acetylalanine                    |                                                  | 0.965          |       |
| oxalate (ethanedioate)             | Ascorbate and Aldarate Metabolism                | 0.830          |       |
| <b><i>Creatine</i></b>             | Creatine Metabolism                              | <b>1.471</b>   |       |
| Isoleucylglycine                   | Dipeptide                                        | 0.911          |       |
| Valylglycine                       |                                                  | 0.960          |       |
| N-linoleoyltaurine*                | Endocannabinoid                                  | 0.706          |       |
| butyrylcarnitine (C4)              | Acyl Carnitine                                   | 0.868          |       |
| octadecanedioylcarnitine (C18-DC)* |                                                  | 0.951          |       |
| 3-methylglutaryl carnitine (2)     |                                                  | 1.012          |       |
| octanoylcarnitine (C8)             |                                                  | 1.002          |       |
| N-acetyl-2-aminooctanoate*         | Fatty Acid                                       | 1.025          |       |
| 2-hydroxyglutarate                 |                                                  | 1.075          |       |
| 12,13-DiHOME                       |                                                  | 0.998          |       |
| 9,10-DiHOME                        |                                                  | 1.016          |       |
| 13-HODE + 9-HODE                   |                                                  | 1.036          |       |
| <b><i>2-hydroxydecanoate</i></b>   |                                                  | <b>1.201</b>   |       |
| 2-hydroxyoctanoate                 |                                                  | 0.977          |       |
| 9-hydroxystearate                  |                                                  | 0.947          |       |
| Ergothioneine                      |                                                  | Food Component | 0.876 |
| Stachydrine                        |                                                  |                | 1.030 |
| (S)-a-amino-omega-caprolactam      | 0.922                                            |                |       |
| ethyl alpha-glucoopyranoside       |                                                  | 0.862          |       |
| Fructose                           | Fructose, Mannose and Galactose Metabolism       | 1.090          |       |
| gamma-glutamylhistidine            | Gamma-glutamyl Amino Acid                        | 0.857          |       |
| Glutamate                          | Glutamate Metabolism                             | 1.034          |       |
| pyroglutamine*                     |                                                  | 0.892          |       |
| <b><i>imidazole lactate</i></b>    |                                                  | <b>1.171</b>   |       |
| imidazole propionate               | Histidine Metabolism                             | 0.933          |       |
| 1-methyl-5-imidazoleacetate        |                                                  | 0.931          |       |
| Isoleucine                         | Leucine, Isoleucine and Valine Metabolism        | 0.986          |       |
| <b><i>5-hydroxylysine</i></b>      |                                                  | <b>1.179</b>   |       |
| Lysine                             | Lysine Metabolism                                | 0.942          |       |
| hydroxy-N6, N6, N6-trimethyllysine |                                                  | 0.877          |       |
| N-formylmethionine                 | Methionine, Cysteine, SAM and Taurine Metabolism | 0.931          |       |
| 1-linoleoylglycerol (18:2)         | Monoacylglycerol                                 | 0.924          |       |
| X - 12026                          | Unknown                                          | 0.898          |       |

| Metabolite                                             | Sub Pathway                                          | VIP          |
|--------------------------------------------------------|------------------------------------------------------|--------------|
| X – 12216                                              |                                                      | 1.055        |
| <b>X – 12456</b>                                       |                                                      | <b>1.254</b> |
| X – 17185                                              |                                                      | 0.830        |
| <b>X – 17676</b>                                       |                                                      | <b>1.245</b> |
| X – 18913                                              |                                                      | 1.109        |
| X – 21286                                              |                                                      | 1.015        |
| X – 21628                                              |                                                      | 0.964        |
| <b>X – 24571</b>                                       |                                                      | <b>1.222</b> |
| X – 24699                                              |                                                      | 0.891        |
| trigonelline (N'-methylnicotinate)                     | Nicotinate and Nicotinamide Metabolism               | 1.093        |
| glucuronide of C12H22O4 (1)*                           | Partially Characterized Molecules                    | 0.973        |
| 1-stearoyl-2-docosahexaenoyl-GPE (18:0/22:6)*          | Phosphatidylethanolamine (PE)                        | 1.022        |
| 1-(1-enyl-palmitoyl)-2-arachidonoyl-GPC (P-16:0/20:4)* | Plasmalogen                                          | 0.854        |
| <b><i>Glycochenodeoxycholate</i></b>                   | <b><i>Primary Bile Acid Metabolism</i></b>           | <b>1.189</b> |
| N1-methylinosine                                       | Purine Metabolism, (Hypo)Xanthine/Inosine containing | 1.181        |
| N4-acetylcytidine                                      | Pyrimidine Metabolism, Cytidine containing           | 0.937        |
| sphinganine-1-phosphate                                | Sphingolipid Metabolism                              | 1.013        |
| 3-indoxyl sulfate                                      | Tryptophan Metabolism                                | 0.872        |
| 5-bromotryptophan                                      |                                                      | 1.051        |
| 3-(4-hydroxyphenyl)lactate                             |                                                      | 0.928        |
| 3-methoxytyramine sulfate                              |                                                      | 0.732        |
| 3-methoxytyrosine                                      | <b><i>Tyrosine Metabolism</i></b>                    | 0.918        |
| Thyroxine                                              |                                                      | 0.813        |
| <b><i>tyramine O-sulfate</i></b>                       |                                                      | <b>1.119</b> |
| N-methylproline                                        | Urea cycle; Arginine and Proline Metabolism          | 1.048        |

The metabolites in **bold and italic** are the most important in the PLS-DA model

**Figure S3.** Results from the PLS-DA model validation. **A:** The histogram represents the distribution of the averaged values (from 100 test-sets) of AUC results from the permutation test; **B:** The histogram represents the distribution of the averaged values (from 100 test-sets) of Classification Error (CE) results from the permutation test. The red vertical lines represent the averaged value (from 100 test set) from the original class.

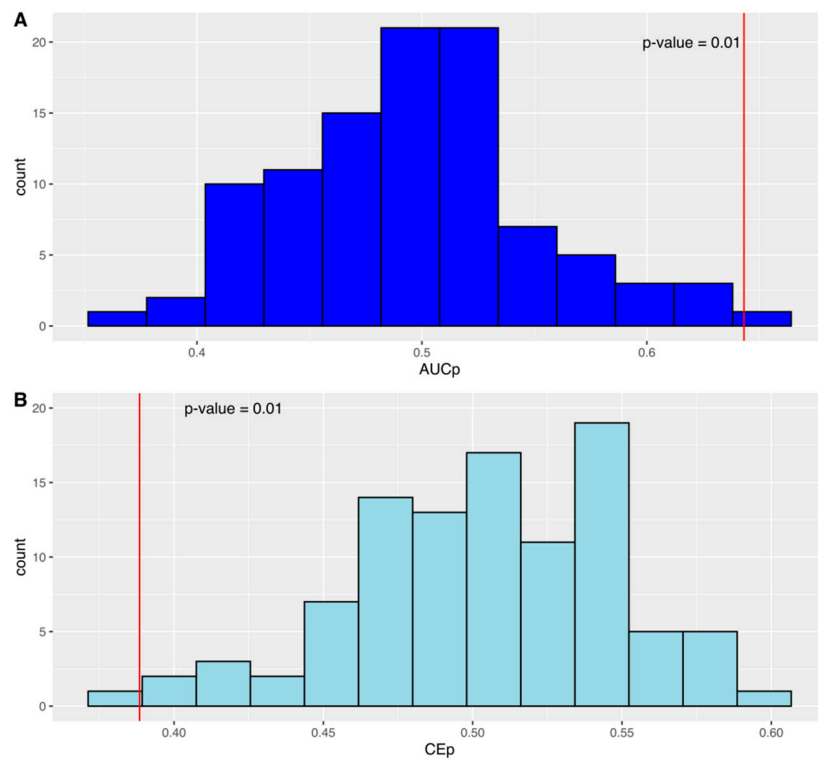

**Table S5.** Nominal significant association ( $p$ -value  $\leq 0.05$ ) between metabolites level in children at 6 months of age and early motor milestones.

| Super Pathway | Sub Pathway                                      | Metabolite                                       | $\beta$ -estimate | p      | CI Low  | CI High |
|---------------|--------------------------------------------------|--------------------------------------------------|-------------------|--------|---------|---------|
| Amino Acid    | Alanine and Aspartate Metabolism                 | N-acetylalanine                                  | 0.1863            | 0.0036 | 0.0612  | 0.3114  |
|               |                                                  | hydroxyasparagine**                              | 0.1489            | 0.0237 | 0.0199  | 0.2778  |
|               | Creatine Metabolism                              | creatine                                         | -0.1744           | 0.0080 | -0.3029 | -0.0458 |
|               | Glutamate Metabolism                             | pyroglutamine*                                   | 0.1516            | 0.0206 | 0.0234  | 0.2798  |
|               |                                                  | N-acetyl-aspartyl-glutamate (NAAG)               | 0.1423            | 0.0267 | 0.0165  | 0.2681  |
|               | Glutathione Metabolism                           | 5-oxoproline                                     | 0.1734            | 0.0070 | 0.0476  | 0.2992  |
|               | Glycine, Serine and Threonine Metabolism         | N-acetylthreonine                                | 0.2042            | 0.0018 | 0.0767  | 0.3317  |
|               |                                                  | N-acetylserine                                   | 0.1603            | 0.0136 | 0.0331  | 0.2875  |
|               | Histidine Metabolism                             | carnosine                                        | 0.1680            | 0.0100 | 0.0403  | 0.2957  |
|               |                                                  | 1-methylhistidine                                | 0.1541            | 0.0171 | 0.0276  | 0.2807  |
|               | Leucine, Isoleucine and Valine Metabolism        | N-acetylvaline                                   | 0.1408            | 0.0283 | 0.0150  | 0.2665  |
|               |                                                  | 5-hydroxylysine                                  | 0.1754            | 0.0067 | 0.0489  | 0.3020  |
|               | Lysine Metabolism                                | 5-(galactosylhydroxy)-L-lysine                   | 0.1430            | 0.0262 | 0.0170  | 0.2690  |
|               |                                                  | N6,N6,N6-trimethyllysine                         | 0.1414            | 0.0280 | 0.0154  | 0.2675  |
|               |                                                  | N-formylmethionine                               | 0.2217            | 0.0006 | 0.0963  | 0.3471  |
|               | Methionine, Cysteine, SAM and Taurine Metabolism | 5-methylthioribose**                             | 0.1385            | 0.0311 | 0.0126  | 0.2644  |
|               |                                                  | methionine sulfone                               | 0.1323            | 0.0418 | 0.0049  | 0.2596  |
|               |                                                  | 2,3-dihydroxy-5-methylthio-4-pentenoate (DMTPA)* | 0.1825            | 0.0060 | 0.0527  | 0.3123  |
|               | Polyamine Metabolism                             | N1,N12-diacetylspermine                          | 0.1946            | 0.0026 | 0.0684  | 0.3207  |
|               |                                                  | acisoga                                          | 0.1552            | 0.0165 | 0.0284  | 0.2820  |
|               |                                                  | 4-acetamidobutanoate                             | 0.1435            | 0.0258 | 0.0174  | 0.2695  |
|               |                                                  | N-acetylputrescine                               | 0.1436            | 0.0266 | 0.0168  | 0.2705  |
|               |                                                  | N-acetyl-isoputrescine*                          | 0.1286            | 0.0457 | 0.0024  | 0.2547  |
|               | Tryptophan Metabolism                            | indolelactate                                    | 0.1521            | 0.0266 | 0.0177  | 0.2866  |
|               |                                                  | N-acetyltryptophan                               | 0.1400            | 0.0306 | 0.0131  | 0.2668  |
|               | Tyrosine Metabolism                              | vanillactate                                     | 0.1816            | 0.0046 | 0.0562  | 0.3070  |
|               |                                                  | tyrosine                                         | -0.1619           | 0.0137 | -0.2905 | -0.0333 |

| Super Pathway | Sub Pathway                            | Metabolite                                                                      | $\beta$ -estimate              | P       | CI Low  | CI High |         |
|---------------|----------------------------------------|---------------------------------------------------------------------------------|--------------------------------|---------|---------|---------|---------|
|               |                                        | 3-(4-hydroxyphenyl)lactate                                                      | 0.1414                         | 0.0294  | 0.0142  | 0.2685  |         |
|               |                                        | N-acetyltyrosine                                                                | 0.1335                         | 0.0382  | 0.0073  | 0.2596  |         |
|               |                                        | Urea cycle; Arginine and Proline Metabolism                                     | dimethylarginine (SDMA + ADMA) | 0.1568  | 0.0157  | 0.0298  | 0.2839  |
| Carbohydrate  | Pentose Metabolism                     | xylose                                                                          | 0.1338                         | 0.0375  | 0.0078  | 0.2597  |         |
| Energy        | TCA Cycle                              | succinate                                                                       | 0.1630                         | 0.0127  | 0.0349  | 0.2911  |         |
|               |                                        | malate                                                                          | 0.1537                         | 0.0166  | 0.0280  | 0.2794  |         |
|               |                                        | succinylcarnitine (C4-DC)                                                       | 0.1439                         | 0.0255  | 0.0177  | 0.2700  |         |
|               |                                        | aconitate [cis or trans]                                                        | 0.1422                         | 0.0281  | 0.0153  | 0.2691  |         |
|               |                                        | andro steroid monosulfate C <sub>19</sub> H <sub>28</sub> O <sub>6</sub> S (1)* | 0.1426                         | 0.0312  | 0.0129  | 0.2723  |         |
| Lipid         | Ceramides                              | glycosyl ceramide (d18:2/24:1, d18:1/24:2)*                                     | 0.1452                         | 0.0342  | 0.0109  | 0.2796  |         |
|               | Fatty Acid Metabolism(Acyl Carnitine)  | dihomo-linoleoylcarnitine (C20:2)*                                              | 0.1883                         | 0.0040  | 0.0605  | 0.3161  |         |
|               |                                        | oleoylcarnitine (C18:1)                                                         | 0.1551                         | 0.0166  | 0.0283  | 0.2818  |         |
|               |                                        | linoleoylcarnitine (C18:2)*                                                     | 0.1509                         | 0.0209  | 0.0230  | 0.2789  |         |
|               |                                        | adipoylcarnitine (C6-DC)                                                        | 0.1534                         | 0.0209  | 0.0234  | 0.2834  |         |
|               |                                        | cerotoylcarnitine (C26)*                                                        | -0.1489                        | 0.0220  | -0.2762 | -0.0215 |         |
|               |                                        | arachidonoylcarnitine (C20:4)                                                   | 0.1463                         | 0.0242  | 0.0192  | 0.2735  |         |
|               |                                        | docosapentaenoylcarnitine (C22:5n3)*                                            | 0.1493                         | 0.0272  | 0.0169  | 0.2818  |         |
|               |                                        | pimeloylcarnitine/3-methyladipoylcarnitine (C7-DC)                              | 0.1435                         | 0.0300  | 0.0139  | 0.2731  |         |
|               |                                        | Fatty Acid, Monohydroxy                                                         | 2-hydroxydecanoate             | 0.1763  | 0.0066  | 0.0492  | 0.3034  |
|               |                                        | Lysophospholipid                                                                | 1-linolenoyl-GPC (18:3)*       | -0.1708 | 0.0087  | -0.2983 | -0.0434 |
|               | Polyunsaturated Fatty Acid (n3 and n6) | hexadecatrienoate (16:3n3)                                                      | -0.1390                        | 0.0330  | -0.2667 | -0.0113 |         |
|               | Pregnenolone Steroids                  | 21-hydroxypregnenolone monosulfate (2)                                          | 0.1444                         | 0.0318  | 0.0126  | 0.2762  |         |
|               | Primary Bile Acid Metabolism           | glycocholate                                                                    | 0.1887                         | 0.0038  | 0.0611  | 0.3163  |         |
|               |                                        | taurocholate                                                                    | 0.1723                         | 0.0075  | 0.0462  | 0.2983  |         |

| Super Pathway | Sub Pathway                                          | Metabolite                                          | $\beta$ -estimate | P       | CI Low  | CI High |
|---------------|------------------------------------------------------|-----------------------------------------------------|-------------------|---------|---------|---------|
|               | Secondary Bile Acid Metabolism                       | taurohyocholate*                                    | 0.1780            | 0.0059  | 0.0516  | 0.3045  |
|               |                                                      | glycohyocholate                                     | 0.1655            | 0.0117  | 0.0369  | 0.2940  |
|               | Sphingolipid Metabolism                              | sphingomyelin (d17:1/16:0, d18:1/15:0, d16:1/17:0)* | -0.1743           | 0.0072  | -0.3012 | -0.0473 |
|               |                                                      | sphingosine 1-phosphate                             | 0.1553            | 0.0162  | 0.0289  | 0.2818  |
|               |                                                      | sphingomyelin (d18:1/21:0, d17:1/22:0, d16:1/23:0)* | -0.1529           | 0.0319  | -0.2925 | -0.0133 |
|               | Sterol                                               | 7-alpha-hydroxy-3-oxo-4-cholestenoate (7-Hoca)      | 0.1784            | 0.0056  | 0.0525  | 0.3043  |
|               | Unknown                                              | Unknown                                             | X - 24293         | -0.2051 | 0.0017  | -0.3326 |
| X - 24952     |                                                      |                                                     | -0.1983           | 0.0019  | -0.3229 | -0.0736 |
| X - 23739     |                                                      |                                                     | 0.1831            | 0.0054  | 0.0543  | 0.3119  |
| X - 11564     |                                                      |                                                     | 0.1825            | 0.0060  | 0.0527  | 0.3123  |
| X - 12026     |                                                      |                                                     | 0.1790            | 0.0060  | 0.0515  | 0.3064  |
| X - 09789     |                                                      |                                                     | 0.1734            | 0.0075  | 0.0466  | 0.3002  |
| X - 12407     |                                                      |                                                     | -0.1748           | 0.0096  | -0.3069 | -0.0427 |
| X - 24545     |                                                      |                                                     | 0.1684            | 0.0129  | 0.0359  | 0.3009  |
| X - 23666     |                                                      |                                                     | 0.1525            | 0.0173  | 0.0271  | 0.2780  |
| X - 13737     |                                                      |                                                     | 0.1512            | 0.0194  | 0.0245  | 0.2778  |
| X - 16938     |                                                      |                                                     | 0.1497            | 0.0211  | 0.0226  | 0.2768  |
| X - 24307     |                                                      |                                                     | 0.1469            | 0.0238  | 0.0196  | 0.2742  |
| X - 16397     |                                                      |                                                     | 0.1462            | 0.0275  | 0.0163  | 0.2762  |
| X - 18913     |                                                      |                                                     | 0.1383            | 0.0327  | 0.0114  | 0.2653  |
| X - 12906     |                                                      |                                                     | 0.1392            | 0.0337  | 0.0108  | 0.2676  |
| X - 16580     |                                                      |                                                     | 0.1439            | 0.0345  | 0.0106  | 0.2772  |
| X - 18887     | 0.1320                                               | 0.0413                                              | 0.0053            | 0.2587  |         |         |
| X - 24544     | 0.1319                                               | 0.0428                                              | 0.0043            | 0.2594  |         |         |
| X - 23196     | 0.1317                                               | 0.0435                                              | 0.0039            | 0.2596  |         |         |
| Nucleotide    | Purine Metabolism, (Hypo)Xanthine/Inosine containing | N1-methylinosine                                    | 0.1815            | 0.0048  | 0.0556  | 0.3074  |
|               |                                                      | urate                                               | 0.1716            | 0.0074  | 0.0462  | 0.2969  |
|               | Purine Metabolism, Adenine containing                | N6-carbamoylthreonyladenosine                       | 0.2320            | 0.0003  | 0.1065  | 0.3575  |

| Super Pathway                     | Sub Pathway                                  | Metabolite                   | $\beta$ -estimate | p      | CI Low  | CI High |
|-----------------------------------|----------------------------------------------|------------------------------|-------------------|--------|---------|---------|
|                                   | Purine Metabolism,<br>Guanine containing     | N2,N2-dimethylguanosine      | 0.1583            | 0.0138 | 0.0324  | 0.2842  |
|                                   | Pyrimidine Metabolism,<br>Orotate containing | dihydroorotate               | 0.1907            | 0.0033 | 0.0638  | 0.3176  |
|                                   | Pyrimidine Metabolism,<br>Thymine containing | 5,6-dihydrothymine           | 0.1774            | 0.0059 | 0.0514  | 0.3035  |
|                                   | Pyrimidine Metabolism,<br>Uracil containing  | pseudouridine                | 0.1686            | 0.0090 | 0.0422  | 0.2949  |
|                                   |                                              | uridine                      | 0.1264            | 0.0496 | 0.0002  | 0.2526  |
| Partially Characterized Molecules | Partially Characterized Molecules            | glucuronide of C12H22O4 (1)* | 0.1406            | 0.0315 | 0.0125  | 0.2687  |
| Peptide                           | Gamma-glutamyl Amino Acid                    | gamma-glutamylglutamine      | 0.1322            | 0.0419 | 0.0048  | 0.2596  |
|                                   |                                              | gamma-glutamyltryptophan     | 0.1307            | 0.0420 | 0.0047  | 0.2566  |
|                                   | Chemical                                     | succinimide                  | 0.1438            | 0.0275 | 0.0160  | 0.2716  |
| Xenobiotics                       | Food Component/Plant                         | tartarate                    | -0.1405           | 0.0310 | -0.2682 | -0.0129 |
|                                   | Xanthine Metabolism                          | 7-methylxanthine             | -0.1475           | 0.0231 | -0.2746 | -0.0204 |



**Figure S4.** Biplot from principal component analysis of all the 13 milestones. A: Biplot from principal component analysis of all the 13 milestones. Principal component 1 and 2 (PC1 and PC2) explain 51% and 21 % of the overall variation in the data, respectively. B: Biplot from principal component analysis of the 7 early motor milestones. Principal component 1 and 2 (PC1 and PC2) explain 45% and 17 % of the overall variation in the data, respectively. C: Biplot from principal component analysis of the 5 gross motor milestones. Principal component 1 and 2 (PC1 and PC2) explain 50 % and 23 % of the overall variation in the data, respectively.

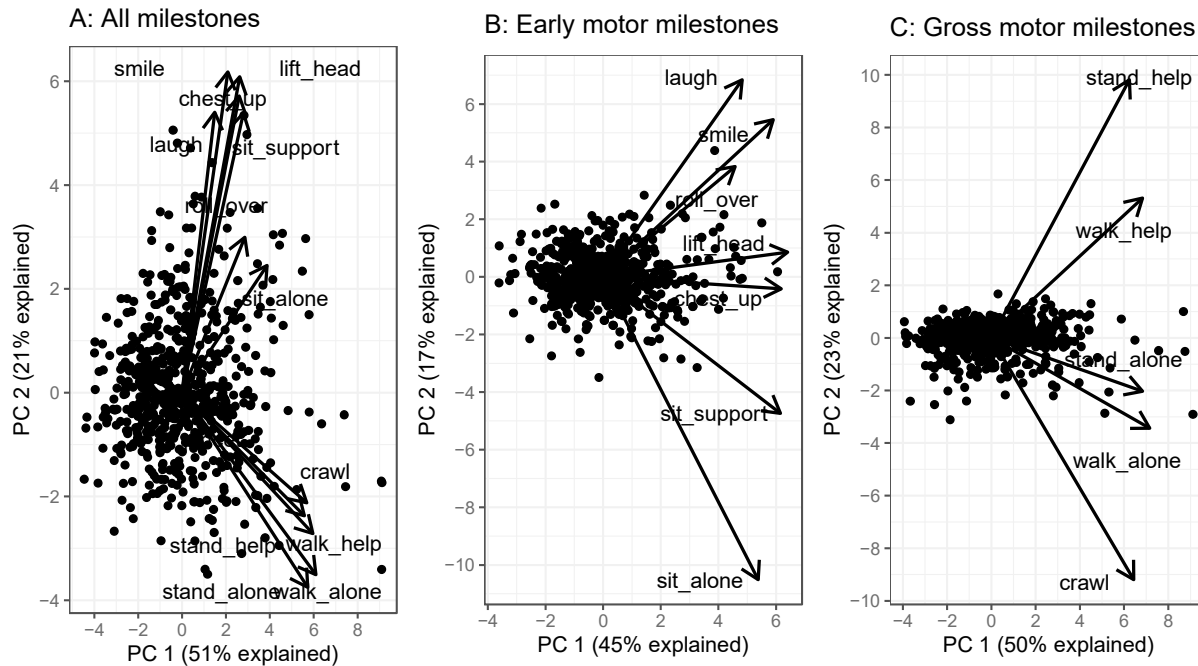

Supplement: metabolites-10-00337-s001.pdf [file metabolites-10-00337-s001.pdf]
